# Supplementary material
Source: PubMed Central journal article supplement (PMC2987441)
Supplement: supp_123_23_4095__1.pdf [file supp_123_23_4095__1.pdf]

Dampened E2F1 and Myb activity in endocycles

| <b>Table S1. Array values for cyclins, CDK's and other cell cycle control genes<sup>1</sup></b> |                               |                |                               |                |                                                              |
|-------------------------------------------------------------------------------------------------|-------------------------------|----------------|-------------------------------|----------------|--------------------------------------------------------------|
| <b>Gene</b>                                                                                     | <b>Log<sub>2</sub> Sg/B-D</b> | <b>P-Value</b> | <b>Log<sub>2</sub> Fb/B-D</b> | <b>P-Value</b> | <b>Biological Process</b>                                    |
| cdc2                                                                                            | -3.43                         | 0.0001         | -1.65                         | 0.2741         | G2/M transition of mitotic cell cycle                        |
| cdc2c (CDK2)                                                                                    | -1.52                         | 0.0510         | nd                            |                | G2/M transition of mitotic cell cycle                        |
| Cdk4                                                                                            | -2.26                         | 0.0074         | -2.04                         | 0.0629         | regulation of cell cycle                                     |
| Cdk7                                                                                            | -1.33                         | 0.0058         | -1.28                         | 0.2514         | M phase of mitotic cell cycle                                |
| Cdk8                                                                                            | -0.54                         | 0.8829         | nd                            |                | G1/S transition of mitotic cell cycle                        |
| Cdk9                                                                                            | -0.39                         | 0.7810         | -0.25                         | 0.4879         | cell adhesion                                                |
| Cdk5                                                                                            | 0.05                          | 0.0088         | nd                            |                | axonogenesis                                                 |
| CG30291 (Cdk5rap3)                                                                              | 1.71                          | 0.1453         | 1.56                          | 0.0849         | regulation of cyclin-dependent protein kinase activity       |
| Cks30A                                                                                          | -3.11                         | 0.0754         | -2.26                         | 0.0269         | positive regulation of mitotic metaphase/anaphase transition |
| Cks85A                                                                                          | nd                            |                | 0.93                          | 0.0105         | Mitosis                                                      |
| CycA                                                                                            | -3.47                         | 0.0037         | nd                            |                | G2/M transition of mitotic cell cycle                        |
| CycB                                                                                            | -3.54                         | 0.0547         | nd                            |                | mitosis                                                      |
| CycB3                                                                                           | -3.05                         | 0.0227         | 0.03                          | 0.0248         | mitosis                                                      |
| CycC                                                                                            | -0.69                         | 0.1385         | -0.69                         | 0.9863         | G2/M transition of mitotic cell cycle                        |
| CycE                                                                                            | -2.60                         | 0.0873         | -3.98                         | 0.0051         | G1/S transition of mitotic cell cycle                        |
| CycG                                                                                            | 0.82                          | 0.0193         | -0.25                         | 0.3930         | unknown                                                      |
| CycH                                                                                            | -1.17                         | 0.2478         | -1.29                         | 0.0035         | transcription initiation from RNA polymerase II promoter     |
| Set                                                                                             | -2.34                         | 0.0088         | -2.13                         | 0.0046         | ecdysone receptor-mediated signaling pathway                 |
| CycK                                                                                            | -0.13                         | 0.6419         | -0.40                         | 0.6583         | nucleosome assembly                                          |
| Polo                                                                                            | -4.80                         | 0.00001        | -1.01                         | 0.7410         | mitotic kinase                                               |
| Aur (Aurora A)                                                                                  | -2.06                         | 0.0900         | nd                            |                | mitotic kinase                                               |
| ial (Aurora B)                                                                                  | -2.60                         | 0.0800         | -1.40                         | 0.0270         | mitotic kinase                                               |
| Mad2                                                                                            | -4.95                         | 0.0080         | 0.11                          | 0.8494         | spindle assembly checkpoint                                  |
| Bub1                                                                                            | -1.17                         | 0.3770         | nd                            |                | spindle assembly checkpoint                                  |
| cdc16 (Apc6)                                                                                    | -1.00                         | 0.3606         | -0.83                         | 0.7212         | regulation of mitotic metaphase/anaphase transition          |
| mr (Apc2)                                                                                       | -1.00                         | 0.3856         | 0.37                          | 0.3600         | cytokinesis                                                  |
| cdc27 (Apc3)                                                                                    | -1.19                         | 0.0480         | -0.40                         | 0.4673         | mitosis                                                      |
| fzy (cdc20)                                                                                     | -4.32                         | 0.0009         | -1.43                         | 0.0125         | regulation of exit from mitosis                              |
| ago (Cdc4, Fbw7)                                                                                | -0.14                         | 0.1285         | nd                            |                | G2/M transition of mitotic cell cycle                        |
| rap (fzr, cdh1)                                                                                 | -0.34                         | 0.7455         | -0.06                         | 0.1679         | positive regulation of exit from mitosis                     |
| Rca1 (Emi)                                                                                      | -2.68                         | 0.0046         | -0.52                         | 0.8210         | G1/S transition of mitotic cell cycle                        |
| dm (Myc)                                                                                        | -1.31                         | 0.0925         | -1.13                         | 0.5940         | regulation of cell cycle                                     |
| Myb                                                                                             | -2.64                         | 0.1163         | -2.07                         | 0.2391         | cytokinesis                                                  |
| Dref                                                                                            | -0.70                         | 0.3403         | -0.92                         | 0.3820         | DNA replication                                              |

1: Red and green font: Twofold decreased and increased, respectively. Red and green shading: Twofold decreased and increased, respectively, with  $P \leq 0.05$ . nd: no data
