# Supplementary material
Source: PubMed Central journal article supplement (PMC2987441)
Supplement: supp_123_23_4095__2.pdf [file supp_123_23_4095__2.pdf]

Dampened E2F1 and Myb activity in endocycles

**Table S2. Array values for genes regulated by the E2F and Rb family (Dimova et al. 2003)<sup>1</sup>.**

| Class | Gene      | Log <sub>2</sub> Sg/B-D | P-Value | Log <sub>2</sub> Fb/B-D | P-Value | Biological Process                 |
|-------|-----------|-------------------------|---------|-------------------------|---------|------------------------------------|
| A     | dnk       | -0.45                   | 0.7617  | nd                      |         | nucleotide metabolism              |
| A     | mus209    | -2.78                   | 0.0012  | -2.53                   | 0.0545  | DNA replication                    |
| A     | Df31      | -4.32                   | 0.0420  | nd                      |         | nucleosome assembly                |
| A     | CG4924    | -2.73                   | 0.0076  | -1.26                   | 0.2809  | cellular homeostasis               |
| A     | glob1     | 2.00                    | 0.0095  | 3.63                    | 0.0696  | oxygen transport                   |
| A     | Klp67A    | -2.99                   | 0.2751  | nd                      |         | chromosome segregation; cytokinesi |
| A     | CycE      | -2.60                   | 0.0873  | -3.98                   | 0.0051  | G1/S transition                    |
| A     | Mcm7      | -2.11                   | 0.0063  | -2.35                   | 0.1269  | DNA replication                    |
| A     | RfC3      | -2.42                   | 0.1193  | nd                      |         | DNA replication                    |
| A     | FK506-bp1 | -2.41                   | 0.0957  | -1.89                   | 0.0439  | protein folding                    |
| A     | CG32436   | nd                      |         | 6.03                    | 0.0283  | unknown                            |
| A     | CG12819   | -2.78                   | 0.0169  | 0.07                    | 0.1754  | brain development                  |
| A     | Mcm2      | -2.76                   | 0.0156  | nd                      |         | DNA replication                    |
| A     | Mcm5      | -2.13                   | 0.2816  | -1.65                   | 0.0608  | DNA replication                    |
| A     | CG4584    | -3.45                   | 0.0378  | -2.64                   | 0.0041  | unknown                            |
| A     | HmgZ      | 1.06                    | 0.0519  | 0.03                    | 0.1877  | chromatin remodeling               |
| A     | Cap-G     | -2.48                   | 0.0108  | nd                      |         | cytokinesis                        |
| A     | Pvr       | 1.69                    | 0.0237  | nd                      |         | actin cytoskeleton                 |
| A     | mRpL20    | -2.07                   | 0.0182  | -0.83                   | 0.9174  | translation                        |
| A     | Ote       | -1.79                   | 0.3553  | nd                      |         | nuclear envelope reassembly        |
| A     | Nnf1a     | -2.03                   | 0.1299  | -1.50                   | 0.0275  | chromosome segregation             |
| A     | tum       | -3.78                   | 0.0052  | -2.47                   | 0.1225  | cytokinesis                        |
| A     | WRNexo    | -1.29                   | 0.2681  | -1.92                   | 0.0037  | WRN DNA exonuclease                |
| A     | CG3961    | 1.61                    | 0.0048  | 3.41                    | 0.0666  | metabolic process                  |
| A     | nod       | -2.09                   | 0.0859  | nd                      |         | chromosome segregation             |
| A     | Hrb87F    | -0.84                   | 0.3700  | -1.33                   | 0.0393  | alternative mRNA splicing          |
| A     | mod(mdg4) | -2.18                   | 0.0331  | -1.81                   | 0.1283  | chromatin organization             |
| A     | Chro      | -1.00                   | 0.3763  | nd                      |         | chromatin organization             |
| A     | CG11943   | -1.61                   | 0.0378  | nd                      |         | unknown                            |
| A     | cdc2c     | -1.52                   | 0.0510  | nd                      |         | kinase, G1/S transition            |
| A     | pav       | -3.45                   | 0.122   | -2.10                   | 0.0087  | cytokinesis                        |
| A     | CG1888    | 1.83                    | 0.0413  | nd                      |         | unknown                            |
| A     | Map60     | -2.44                   | 0.0206  | nd                      |         | microtubule-based process          |
| A     | polo      | -4.80                   | 0.00001 | -1.01                   | 0.7406  | mitotic kinase                     |
| A     | l(3)neo26 | -2.80                   | 0.1290  | nd                      |         | unknown                            |
| A     | RPA2      | -1.91                   | 0.0039  | -0.91                   | 0.7912  | DNA replication                    |
| A     | Chrac-14  | -2.00                   | 0.00009 | -1.49                   | 0.4293  | nucleosome remodeling              |
| A     | Hel25E    | -1.44                   | 0.2044  | -1.90                   | 0.2415  | mitotic spindle                    |

Dampened E2F1 and Myb activity in endocycles

|   |                      |       |         |       |        |                                             |
|---|----------------------|-------|---------|-------|--------|---------------------------------------------|
| A | Hel25E               | -1.44 | 0.2044  | -1.90 | 0.2415 | mitotic spindle organization                |
| A | Spc105R              | -3.63 | 0.00002 | -0.74 | 0.9577 | mitotic spindle organization                |
| A | CG8289               | -1.47 | 0.0120  | -3.11 | 0.1242 | chromatin assembly or disassembly           |
| A | sti                  | -3.89 | 0.0681  | -2.38 | 0.0525 | chromatin organization                      |
| A | dap                  | -3.10 | 0.0081  | nd    |        | CKi, negative regulation of G1/S transition |
| A | Sd                   | -2.08 | 0.0128  | -2.40 | 0.0856 | compound eye morphogenesis                  |
| A | Kmn1                 | -3.20 | 0.0112  | -3.21 | 0.1638 | chromosome segregation                      |
| A | Nup107               | -1.12 | 0.2143  | nd    |        | nuclear transport                           |
| A | RnrS                 | -0.65 | 0.4419  | -1.27 | 0.0187 | nucleotide metabolism                       |
|   |                      |       |         |       |        |                                             |
| B | DNAprim              | -1.90 | 0.0050  | -3.05 | 0.1949 | DNA replication                             |
| B | His2Av               | -2.14 | 0.0005  | -2.45 | 0.1477 | histone variant                             |
| B | CG9752               | -0.60 | 0.5822  | -2.48 | 0.0706 | unknown                                     |
| B | HmgD                 | -2.99 | 0.1190  | nd    |        | chromatin organization                      |
| B | Mcm3                 | -3.16 | 0.0001  | -2.77 | 0.0145 | DNA replication                             |
| B | DNAPol- $\alpha$ 180 | -0.88 | 0.8236  | nd    |        | DNA replication                             |
| B | UK114                | 4.46  | 0.0007  | 5.17  | 0.0267 | negative regulation of translation          |
| B | Mes4                 | -0.45 | 0.6878  | -1.02 | 0.7546 | DNA replication                             |
| B | CG13350              | -1.56 | 0.0978  | nd    |        | unknown                                     |
| B | geminin              | -2.42 | 0.0054  | -1.55 | 0.2598 | negative regulation of DNA replication      |
| B | CG3430               | -1.99 | 0.0132  | -1.96 | 0.3639 | unknown                                     |
| B | Rfc40                | -1.84 | 0.0479  | -1.80 | 0.1518 | DNA replication                             |
| B | Orc5                 | -0.84 | 0.4995  | nd    |        | DNA replication                             |
| B | CDC45L               | -1.01 | 0.2253  | nd    |        | DNA replication                             |
| B | msd5                 | -2.38 | 0.0445  | nd    |        | mitotic spindle organization                |
| B | CG9740               | -1.89 | 0.1557  | -0.43 | 0.5707 | unknown                                     |
| B | CG10336              | -1.54 | 0.0033  | nd    |        | cell cycle                                  |
| B | SMC2                 | nd    |         | -2.00 | 0.1569 | mitotic chromosome condensation             |
| B | CG30457              | 1.40  | 0.1607  | -0.69 | 0.5564 | unknown                                     |
| B | spd-2                | -1.84 | 0.0349  | -0.94 | 0.6324 | mitotic spindle organization                |
| B | DNAPol- $\delta$     | -1.57 | 0.0749  | nd    |        | DNA replication                             |
| B | CG5602               | -2.23 | 0.0450  | -1.52 | 0.4504 | DNA replication                             |
| B | Fen1                 | nd    |         | -1.29 | 0.3118 | DNA replication                             |
| B | mad2                 | -4.95 | 0.0081  | -0.71 | 0.8494 | spindle checkpoint                          |
| B | DNAPol- $\alpha$ 50  | -1.06 | 0.0418  | nd    |        | DNA replication                             |
| B | CG13690              | -1.81 | 0.0045  | nd    |        | RNA metabolic process                       |
| B | CG8142               | -2.61 | 0.0573  | -1.64 | 0.2327 | DNA replication                             |
| B | Rrp1                 | -3.42 | 0.1855  | -5.11 | 0.1151 | DNA repair                                  |

## Dampened E2F1 and Myb activity in endocycles

|                                                                                                                                                                                        |         |       |         |       |        |                                  |
|----------------------------------------------------------------------------------------------------------------------------------------------------------------------------------------|---------|-------|---------|-------|--------|----------------------------------|
| C                                                                                                                                                                                      | mars    | -2.91 | 0.1376  | nd    |        | regulation of mitotic cell cycle |
| C                                                                                                                                                                                      | msd1    | -3.81 | 0.00002 | -0.23 | 0.5344 | mitotic spindle organization     |
| C                                                                                                                                                                                      | Sep5    | nd    |         | -0.88 | 0.9559 | cytokinesis                      |
| C                                                                                                                                                                                      | BthD    | -3.59 | 0.0010  | -3.04 | 0.0521 | redox signal response            |
| D                                                                                                                                                                                      | Ndc80   | -1.31 | 0.7789  | nd    |        | chromosome segregation           |
| D                                                                                                                                                                                      | CG14434 | -2.16 | 0.0976  | -2.05 | 0.2180 | cAMP metabolic process           |
| D                                                                                                                                                                                      | CG8447  | nd    |         | 0.14  | 0.3477 | unknown                          |
| D                                                                                                                                                                                      | CG8399  | -2.25 | 0.0091  | -0.84 | 0.8459 | histidine catabolic process      |
| D                                                                                                                                                                                      | CG8316  | nd    |         | 4.29  | 0.0732 | unknown                          |
| D                                                                                                                                                                                      | CG9427  | 1.06  | 0.5942  | -1.98 | 0.1157 | unknown                          |
| E                                                                                                                                                                                      | Rpt3R   | nd    |         | 2.82  | 0.1279 | proteolysis                      |
| E                                                                                                                                                                                      | NtR     | -0.80 | 0.3749  | nd    |        | ion transport                    |
| E                                                                                                                                                                                      | qtc     | 1.08  | 0.2063  | 0.58  | 0.2043 | male courtship behavior          |
| E                                                                                                                                                                                      | CG6845  | -1.00 | 0.1112  | -1.41 | 0.4532 | unknown                          |
| E                                                                                                                                                                                      | CG6790  | nd    |         | 6.91  | 0.0072 | GPI anchor biosynthetic process  |
| E                                                                                                                                                                                      | CG7997  | 2.72  | 0.0027  | 3.62  | 0.0088 | carbohydrate metabolic process   |
| E                                                                                                                                                                                      | Arp53D  | nd    |         | 7.08  | 0.1222 | cytoskeleton organization        |
| E                                                                                                                                                                                      | CG3505  | 2.60  | 0.0280  | 3.68  | 0.0106 | proteolysis                      |
| E                                                                                                                                                                                      | CG7628  | -2.97 | 0.0106  | -2.91 | 0.0625 | phosphate transport              |
| <sup>1</sup> Red and green font: Twofold decreased and increased, respectively. Red and green shading: Twofold decreased and increased, respectively, with $P \leq 0.05$ . nd: no data |         |       |         |       |        |                                  |
