# Supplementary material
Source: PubMed Central journal article supplement (PMC2987441)
Supplement: supp_123_23_4095__3.pdf [file supp_123_23_4095__3.pdf]

Dampened E2F1 and Myb activity in endocycles

| <b>Table S3 Array values for genes regulated by the Myb-MuvB / dREAM complex (Georlette et al. 2007).<sup>1</sup></b> |             |                               |                |                               |                |                                |
|-----------------------------------------------------------------------------------------------------------------------|-------------|-------------------------------|----------------|-------------------------------|----------------|--------------------------------|
| <b>Class</b>                                                                                                          | <b>Gene</b> | <b>Log<sub>2</sub> Sg/B-D</b> | <b>P-Value</b> | <b>Log<sub>2</sub> Fb/B-D</b> | <b>P-Value</b> | <b>Biological Process</b>      |
| A                                                                                                                     | Arp53D      | nd                            |                | 7.08                          | 0.1222         | cytoskeleton organization      |
| A                                                                                                                     | CG10157     | 3.15                          | 0.1360         | 3.19                          | 0.0897         | unknown                        |
| A                                                                                                                     | CG10383     | 0.84                          | 0.1218         | 2.55                          | 0.0020         | unknown                        |
| A                                                                                                                     | CG11089     | 3.07                          | 0.1483         | nd                            |                | IMP biosynthetic process       |
| A                                                                                                                     | CG11760     | -0.14                         | 0.6104         | 0.23                          | 0.0172         | unknown                        |
| A                                                                                                                     | CG12643     | 0.36                          | 0.5332         | 0.07                          | 0.0877         | unknown                        |
| A                                                                                                                     | CG15829     | 1.68                          | 0.4390         | 6.12                          | 0.3952         | cellular acyl-CoA homeostasis  |
| A                                                                                                                     | MCPH1       | -0.31                         | 0.9742         | 2.01                          | 0.0028         | mushroom body development      |
| A                                                                                                                     | CG5080      | nd                            |                | 2.03                          | 0.1333         | unknown                        |
| A                                                                                                                     | CG7755      | nd                            |                | 6.27                          | 0.0029         | oxidation reduction            |
| A                                                                                                                     | CG7997      | 2.60                          | 0.0027         | 3.62                          | 0.0088         | carbohydrate metabolic process |
| A                                                                                                                     | CG8316      | nd                            |                | 4.29                          | 0.0732         | unknown                        |
| A                                                                                                                     | Irc         | 2.68                          | 0.0048         | 3.84                          | 0.0010         | response to oxidative stress   |
| A                                                                                                                     | CG9427      | 0.10                          | 0.5942         | -1.98                         | 0.1157         | unknown                        |
| A                                                                                                                     | CG9577      | 1.43                          | 0.0035         | 2.33                          | 0.0268         | metabolic process              |
| A                                                                                                                     | Cp1         | 1.14                          | 0.2247         | -0.01                         | 0.0880         | protein catabolic process      |
| A                                                                                                                     | drongo      | -0.37                         | 0.8762         | -0.11                         | 0.3009         | regulation of ARF GTPase       |
| A                                                                                                                     | Fer1HCH     | -0.02                         | 0.2621         | 0.56                          | 0.1913         | cellular iron homeostasis      |
| A                                                                                                                     | Fer2LCH     | -0.28                         | 0.8570         | 0.05                          | 0.2429         | cellular iron homeostasis      |
| A                                                                                                                     | Myo31DF     | 1.08                          | 0.0994         | nd                            |                | mesoderm development           |
| A                                                                                                                     | NtR         | 0.55                          | 0.3749         | nd                            |                | ion transport                  |
| A                                                                                                                     | Paip2       | 1.42                          | 0.2593         | 1.23                          | 0.2733         | regulation of cell growth      |
| A                                                                                                                     | qtc         | 1.08                          | 0.2063         | 0.58                          | 0.2043         | male courtship behavior        |
| A                                                                                                                     | Rpt3R       | nd                            |                | 2.82                          | 0.1279         | proteolysis                    |
| A                                                                                                                     | apt         | -3.13                         | 0.0017         | -2.20                         | 0.0281         | branching tube morphogenesis   |
| A                                                                                                                     | CG16953     | -0.44                         | 0.6412         | -0.66                         | 0.9109         | unknown                        |
| A                                                                                                                     | CG7628      | -2.97                         | 0.0106         | -2.91                         | 0.0625         | phosphate transport            |
| A                                                                                                                     | CG7686      | -0.76                         | 0.5595         | -0.11                         | 0.4709         | unknown                        |
| A                                                                                                                     | CG9601      | -1.50                         | 0.2815         | -1.03                         | 0.5188         | unknown                        |
| A                                                                                                                     | how         | -1.85                         | 0.0980         | -0.83                         | 0.7472         | cell differentiation           |
| A                                                                                                                     | Jhl-21      | -1.46                         | 0.1464         | -2.25                         | 0.1862         | leucine import                 |
| A                                                                                                                     | Marf        | nd                            |                | 0.58                          | 0.0213         | mitochondrion organization     |
| A                                                                                                                     | shtd        | -1.28                         | 0.0588         | -2.25                         | 0.0654         | unknown                        |
| A                                                                                                                     | CG2183      | -1.32                         | 0.0561         | -0.37                         | 0.6811         | mismatch repair                |
| A                                                                                                                     | CG2264      | -1.59                         | 0.1863         | nd                            |                | signal transduction            |
| B                                                                                                                     | CG10630     | nd                            |                | 6.51                          | 0.0289         | unknown                        |
| B                                                                                                                     | CG14864     | 2.66                          | 0.0814         | nd                            |                | unknown                        |
| B                                                                                                                     | CG17625     | nd                            |                | 5.54                          | 0.0231         | unknown                        |
| B                                                                                                                     | CG31100     | 4.45                          | 0.2590         | nd                            |                | monosaccharide transport       |

Dampened E2F1 and Myb activity in endocycles

|   |             |       |        |       |         |                                               |
|---|-------------|-------|--------|-------|---------|-----------------------------------------------|
| B | CG9542      | 2.80  | 0.1481 | nd    |         | unknown                                       |
| B | crb         | 0.59  | 0.2460 | nd    |         | organ morphogenesis                           |
| B | hdm         | 0.30  | 0.0639 | 0.68  | 0.1276  | reciprocal meiotic recombination              |
| B | Lsd-1       | 4.84  | 0.0123 | 5.84  | 0.0029  | lipid storage                                 |
| B | Pfk         | -1.13 | 0.1106 | 0.32  | 0.0878  | glycolysis                                    |
| B | CG14312     | -3.64 | 0.0224 | -1.24 | 0.4652  | unknown                                       |
| B | CG5191      | -1.64 | 0.0873 | -1.07 | 0.7100  | unknown                                       |
| B | Sas         | -3.43 | 0.0035 | -1.88 | 0.0710  | carbohydrate biosynthetic process             |
| B | Vha68-1     | -3.09 | 0.1509 | -1.06 | 0.1607  | proton transport                              |
| B | drpr        | 0.37  | 0.1355 | -0.89 | 0.8601  | cell adhesion                                 |
|   |             |       |        |       |         |                                               |
| C | CG12161     | nd    |        | 6.20  | 0.00031 | proteolysis                                   |
| C | CG14995     | nd    |        | 4.57  | 0.00111 | autophagic cell death                         |
| C | CG32436     | nd    |        | 6.03  | 0.02828 | unknown                                       |
| C | CG6737      | nd    |        | 6.52  | 0.08096 | ATP synthesis coupled proton transport        |
| C | CG6980      | nd    |        | 5.18  | 0.23645 | unknown                                       |
| C | CG7045      | nd    |        | 8.32  | 0.03977 | unknown                                       |
| C | CG7208      | nd    |        | 5.49  | 0.11213 | unknown                                       |
| C | CG9875      | nd    |        | 6.65  | 0.00187 | metabolic process                             |
| C | skpB        | 4.09  | 0.0335 | 5.17  | 0.02433 | ubiquitin-dependent protein catabolic process |
| C | CG31751     | 2.75  | 0.0058 | nd    |         | unknown                                       |
| C | CG6330      | 2.56  | 0.0002 | nd    |         | nucleoside metabolic process                  |
| C | Cyp4e2      | 2.54  | 0.0026 | 3.83  | 0.19713 | unknown                                       |
| C | ldgf1       | 2.30  | 0.0016 | 4.53  | 0.05829 | imaginal disc development                     |
| C | CG9989      | 2.55  | 0.0004 | nd    |         | unknown                                       |
| C | CG7966      | 2.41  | 0.0801 | 3.63  | 0.00224 | unknown                                       |
| C | CG8206      | 1.43  | 0.0554 | 2.78  | 0.21008 | unknown                                       |
| C | CG8788      | 1.11  | 0.0179 | 2.02  | 0.02450 | unknown                                       |
| C | CG5059      | 0.94  | 0.0174 | 0.72  | 0.04047 | positive regulation of apoptosis              |
| C | CG11686     | 0.83  | 0.2417 | 0.64  | 0.02192 | unknown                                       |
| C | CG17090     | 0.23  | 0.1492 | 0.36  | 0.19974 | protein amino acid phosphorylation            |
| C | CG6115      | 0.21  | 0.4345 | 0.70  | 0.05265 | unknown                                       |
| C | egr         | -0.07 | 0.4177 | 0.76  | 0.26034 | JNK cascade; induction of apoptosis           |
| C | Rbf2        | 0.46  | 0.0171 | -0.33 | 0.08957 | regulation of cell cycle                      |
| C | tok         | -1.33 | 0.0644 | 0.09  | 0.32888 | imaginal disc-derived wing vein morphogenesis |
| C | CG5281      | -1.63 | 0.2039 | 0.45  | 0.18795 | unknown                                       |
| C | CG1998      | -1.95 | 0.2235 | -1.16 | 0.44774 | oxidation reduction                           |
| C | CG3508      | -1.55 | 0.1384 | -0.49 | 0.30569 | unknown                                       |
| C | ea          | -1.78 | 0.0525 | -1.99 | 0.33110 | toll signaling pathway                        |
| C | lectin-24Db | -1.60 | 0.0050 | 0.12  | 0.22301 | unknown                                       |

Dampened E2F1 and Myb activity in endocycles

|   |            |       |         |       |         |                                                      |
|---|------------|-------|---------|-------|---------|------------------------------------------------------|
| C | L          | -1.74 | 0.0032  | -1.15 | 0.14797 | negative regulation of programmed cell death         |
| C | Nrg        | -1.89 | 0.0048  | -1.22 | 0.59819 | organ development                                    |
| C | CG4502     | -1.79 | 0.4616  | nd    |         | regulation of protein metabolic process              |
| C | plexB      | -0.83 | 0.4098  | -2.82 | 0.05312 | signal transduction                                  |
| C | ed         | -2.59 | 0.1112  | -4.01 | 0.11519 | organ morphogenesis                                  |
| C | CG3964     | -2.50 | 0.0594  | nd    |         | protein modification process                         |
| C | TM4SF      | -2.51 | 0.0568  | -0.90 | 0.69724 | unknown                                              |
| C | Rab23      | nd    |         | -1.86 | 0.00551 | small GTPase mediated signal transduction            |
| C | CG9634     | -3.42 | 0.0024  | -3.91 | 0.05901 | proteolysis                                          |
| C | BthD       | -3.59 | 0.0010  | -3.04 | 0.05210 | redox signal response                                |
| C | DAAM       | -5.18 | 0.0055  | -1.09 | 0.55658 | actin cytoskeleton organization                      |
| C | CG13320    | nd    |         | nd    |         | unknown                                              |
| C | CG13848    | 0.12  | 0.4192  | nd    |         | rhodopsin biosynthetic process; phototransduction    |
| C | CG6643     | 2.83  | 0.00017 | 1.70  | 0.21639 | unknown                                              |
| C | CG8801     | -0.72 | 0.0721  | -0.62 | 0.77993 | unknown                                              |
| C | CG9154     | -1.08 | 0.0592  | -0.35 | 0.23413 | methylation                                          |
| C | TI         | -0.76 | 0.5144  | nd    |         | response to stress                                   |
| C | tor        | -0.77 | 0.3712  | -1.14 | 0.67123 | torso signaling pathway                              |
| C | CG14117    | -0.07 | 0.1934  | nd    |         | unknown                                              |
|   |            |       |         |       |         |                                                      |
| D | CG2930     | nd    |         | 4.10  | 0.3287  | oligopeptide transport                               |
| D | CG4822     | 3.26  | 0.0455  | 3.56  | 0.0012  | unknown                                              |
| D | Gs1        | 3.41  | 0.0412  | 3.74  | 0.0006  | glutamine biosynthetic process                       |
| D | glob1      | 2.00  | 0.0095  | 3.63  | 0.0696  | oxygen transport                                     |
| D | CG12428    | 1.64  | 0.0054  | 2.98  | 0.0327  | unknown                                              |
| D | regucalcin | 2.18  | 0.1588  | 2.42  | 0.0025  | unknown                                              |
| D | CG33969    | 0.60  | 0.0170  | 0.89  | 0.3469  | G-protein coupled receptor protein signaling pathway |
| D | CG10165    | -0.26 | 0.5745  | 0.83  | 0.2089  | unknown                                              |
| D | CG13163    | nd    |         | 0.93  | 0.1713  | translational initiation                             |
| D | CG10424    | 0.90  | 0.0495  | 0.79  | 0.0004  | unknown                                              |
| D | CG11455    | -0.62 | 0.7080  | 0.25  | 0.4154  | mitochondrial electron transport                     |
| D | Pxn        | -1.33 | 0.0820  | -0.03 | 0.4373  | response to oxidative stress                         |
| D | CG4164     | 0.96  | 0.0033  | -0.34 | 0.6016  | response to heat; protein folding                    |
| D | CG31549    | -0.03 | 0.5820  | -0.46 | 0.7247  | metabolic process                                    |
| D | CG18528    | -1.00 | 0.4708  | -1.00 | 0.3990  | tRNA modification                                    |
| D | Pen        | -3.84 | 0.0304  | -0.45 | 0.8925  | cytoplasmic transport                                |
| D | RacGAP50   | -3.78 | 0.0052  | -2.47 | 0.1225  | dendrite morphogenesis                               |
| D | CG13914    | -3.81 | 0.00002 | -0.23 | 0.5344  | mitotic spindle organization                         |
| D | CycB       | -3.54 | 0.0547  | nd    |         | mitosis                                              |
| D | pav        | -3.45 | 0.1218  | -2.10 | 0.0087  | cytokinesis                                          |

## Dampened E2F1 and Myb activity in endocycles

|                                                                                                                                                                         |           |       |        |       |        |                                     |
|-------------------------------------------------------------------------------------------------------------------------------------------------------------------------|-----------|-------|--------|-------|--------|-------------------------------------|
| D                                                                                                                                                                       | pim       | -3.21 | 0.0012 | -0.77 | 0.8483 | mitotic chromosome segregation      |
| D                                                                                                                                                                       | sip2      | -3.11 | 0.1199 | 0.18  | 0.0146 | unknown                             |
| D                                                                                                                                                                       | l(1)G0237 | -3.20 | 0.0112 | -3.21 | 0.1638 | chromosome segregation              |
| D                                                                                                                                                                       | Klp67A    | -2.99 | 0.2751 | nd    |        | chromosome segregation              |
| D                                                                                                                                                                       | CG8173    | -3.00 | 0.0382 | -1.66 | 0.2294 | protein amino acid phosphorylation  |
| D                                                                                                                                                                       | feo       | -3.28 | 0.0167 | -1.71 | 0.1802 | cytokinesis                         |
| D                                                                                                                                                                       | sle       | -2.78 | 0.0169 | 0.07  | 0.1754 | brain development                   |
| D                                                                                                                                                                       | ial       | -2.60 | 0.0759 | -2.10 | 0.0267 | cytokinesis                         |
| D                                                                                                                                                                       | Klp61F    | -2.73 | 0.0572 | -1.87 | 0.0260 | microtubule-based movement          |
| D                                                                                                                                                                       | CG2213    | -2.38 | 0.0445 | nd    |        | mitotic spindle organization        |
| D                                                                                                                                                                       | scra      | -2.11 | 0.0128 | -2.30 | 0.0462 | cytokinesis                         |
| D                                                                                                                                                                       | CG14896   | -2.08 | 0.0063 | -0.62 | 0.9306 | unknown                             |
| D                                                                                                                                                                       | Nnf1a     | -2.03 | 0.1299 | -1.50 | 0.0275 | mitotic metaphase plate congression |
| D                                                                                                                                                                       | CG11454   | -0.40 | 0.9080 | -0.58 | 0.8832 | unknown                             |
| 1: Red and green font: 2 fold decreased and increased respectively. Red and green shading: 2 fold decreased and increased respectively with $p \leq 0.05$ . nd: no data |           |       |        |       |        |                                     |
