# Supplementary material
Source: PubMed Central journal article supplement (PMC2987441)
Supplement: supp_123_23_4095__4.pdf [file supp_123_23_4095__4.pdf]

Dampened E2F1 and Myb activity in endocycles

| <b>Table S4. Array values for G1/S phase control and DNA replication genes<sup>1</sup>.</b> |                                   |                |                                   |                |                                                            |
|---------------------------------------------------------------------------------------------|-----------------------------------|----------------|-----------------------------------|----------------|------------------------------------------------------------|
| <b>Gene</b>                                                                                 | <b>Log<sub>2</sub><br/>Sg/B-D</b> | <b>P-Value</b> | <b>Log<sub>2</sub><br/>Fb/B-D</b> | <b>P-Value</b> | <b>Biological Process</b>                                  |
| CycE                                                                                        | -2.60                             | 0.0873         | -3.98                             | 0.0051         | cyclin, G1/S transition                                    |
| cdc2c (CDK2)                                                                                | -1.52                             | 0.0510         | nd                                |                | kinase, G1/S transition                                    |
| dap (Cki p27)                                                                               | -3.08                             | 0.0081         | nd                                |                | CDKi, G1/S transition                                      |
| E2F1                                                                                        | -0.69                             | 0.4808         | -2.20                             | 0.0856         | transcription factor, G1/S transition                      |
| E2F2                                                                                        | -0.20                             | 0.8060         | 0.53                              | 0.0933         | transcription factor, G1/S transition, developmental genes |
| Rbf2                                                                                        | 0.46                              | 0.0171         | -0.33                             | 0.0896         | negative regulation G1/S                                   |
| Dref                                                                                        | -0.70                             | 0.3403         | -0.92                             | 0.3820         | transcription factor, DNA replication                      |
| chif (Dbf4)                                                                                 | -0.58                             | 0.5064         | -0.55                             | 0.7183         | regulation of DNA replication                              |
| ago (Cdc4)                                                                                  | -0.14                             | 0.1285         | nd                                |                | ubi ligase, CycE proteolysis                               |
| mr (Apc2)                                                                                   | -1.38                             | 0.3856         | -0.55                             | 0.3600         | cytokinesis, Geminin proteolysis                           |
| Orc4                                                                                        | -1.14                             | 0.0334         | -0.55                             | 0.7539         | DNA replication, ORC                                       |
| Orc5                                                                                        | -0.84                             | 0.4995         | nd                                |                | DNA replication, ORC                                       |
| Mcm2                                                                                        | -2.76                             | 0.0156         | nd                                |                | DNA replication, helicase complex                          |
| Mcm3                                                                                        | -3.16                             | 0.0001         | -2.77                             | 0.0145         | DNA replication, helicase complex                          |
| Mcm4 (dpa)                                                                                  | -5.25                             | 0.0682         | nd                                |                | DNA replication, helicase complex                          |
| Mcm5                                                                                        | -2.13                             | 0.2816         | -1.65                             | 0.0608         | DNA replication, helicase complex                          |
| Mcm6                                                                                        | -2.36                             | 0.1196         | -2.51                             | 0.1535         | DNA replication, helicase complex                          |
| Mcm7                                                                                        | -2.11                             | 0.0063         | -2.35                             | 0.1269         | DNA replication, helicase complex                          |
| geminin                                                                                     | -2.42                             | 0.0054         | -1.55                             | 0.2598         | DNA replication, inhibitor Cdt1                            |
| CDC45L                                                                                      | -1.01                             | 0.2253         | nd                                |                | DNA replication, CMG complex                               |
| Psf1                                                                                        | 0.14                              | 0.0816         | -0.68                             | 0.9882         | DNA replication, GINS complex                              |
| mus209 (PCNA)                                                                               | -2.78                             | 0.0012         | -2.53                             | 0.0545         | DNA replication, sliding clamp                             |
| CG8142 (Rfc)                                                                                | -2.61                             | 0.0573         | -1.64                             | 0.2327         | DNA replication, clamp loader                              |
| Gnf1 (Rfc)                                                                                  | -1.00                             | 0.0631         | nd                                |                | DNA replication, clamp loader                              |
| Rfc3                                                                                        | -2.42                             | 0.1193         | nd                                |                | DNA replication, clamp loader                              |
| Rfc38                                                                                       | -2.01                             | 0.0031         | -2.17                             | 0.3319         | DNA replication, clamp loader                              |
| Rfc40                                                                                       | -1.84                             | 0.0479         | -1.80                             | 0.1518         | DNA replication, clamp loader                              |
| DNApol-α180                                                                                 | -0.88                             | 0.8236         | nd                                |                | DNA replication, polymerase                                |
| DNApol-α60                                                                                  | -1.90                             | 0.0050         | -3.05                             | 0.1949         | DNA replication, polymerase                                |
| DNApol-α50                                                                                  | -1.06                             | 0.0418         | nd                                |                | DNA replication, polymerase                                |
| DNApol-δ                                                                                    | 1.38                              | 0.0749         | nd                                |                | DNA replication, polymerase                                |
| DNApol-γ35                                                                                  | -1.13                             | 0.0528         | -0.20                             | 0.5312         | DNA replication, polymerase                                |
| DNAprimase                                                                                  | -1.90                             | 0.0050         | -3.05                             | 0.1949         | DNA replication, polymerase                                |
| RpA-70                                                                                      | -2.32                             | 0.0013         | -1.94                             | 0.1803         | DNA replication, ssDNA binding                             |
| Fen1                                                                                        | nd                                |                | -1.29                             | 0.3118         | DNA replication, flap endonuclease                         |
| CG5602 (DNA Llgase I)                                                                       | -2.23                             | 0.0450         | -1.52                             | 0.4504         | DNA replication, ligase                                    |
| tim CG3234                                                                                  | nd                                |                | -0.95                             | 0.2700         | DNA replication, fork checkpoint                           |
| Dhfr                                                                                        | -0.90                             | 0.2111         | -0.79                             | 0.9845         | nucleotide metabolic process                               |
| dnk                                                                                         | -0.45                             | 0.7617         | nd                                |                | nucleotide metabolic process                               |
| nmdyn-D7 (NDP kinase)                                                                       | nd                                |                | 2.37                              | 0.0508         | nucleotide metabolic process                               |
| RnrS                                                                                        | -0.65                             | 0.4419         | -0.79                             | 0.0187         | nucleotide metabolic process                               |

1: Red and green font: Twofold decreased and increased respectively. Red and green shading: Twofold decreased and increased respectively with  $P \leq 0.05$ . nd: no data
